# Supplementary material for: Mechanochemistry of Phosphate Esters Confined between Sliding Iron Surfaces
Source: Research Square preprint supplement (doi:10.21203/rs.3.rs-608818/v1), 2021-06-10
Supplement: Supplementary file 1 [file 00b80f59d2b9cfc45d82f686.docx]

**Supplementary Information for: Mechanochemistry of Phosphate Esters Confined between Sliding Iron Surfaces**

Carlos Ayestarán Latorre,1,2 Joseph E. Remias,3 Joshua D. Moore,3 Hugh A. Spikes,1 Daniele Dini,1,4,5 James P. Ewen1,4,5,*

1 – Department of Mechanical Engineering, Imperial College London, South Kensington Campus, London, SW7 2AZ, United Kingdom

2 – Department of Materials, Imperial College London, South Kensington Campus, London, SW7 2AZ, United Kingdom

3 – Afton Chemical Corporation, Richmond, Virginia 23219, United States of America

4 – Institute of Molecular Science and Engineering, Imperial College London, South Kensington Campus, London, SW7 2AZ, United Kingdom

5 – Thomas Young Centre for Theory and Simulation of Materials, Imperial College London, South Kensington Campus, London, SW7 2AZ, United Kingdom

* Corresponding author email: [j.ewen@imperial.ac.uk](mailto:j.ewen@imperial.ac.uk)

**Supplementary Figures**

**
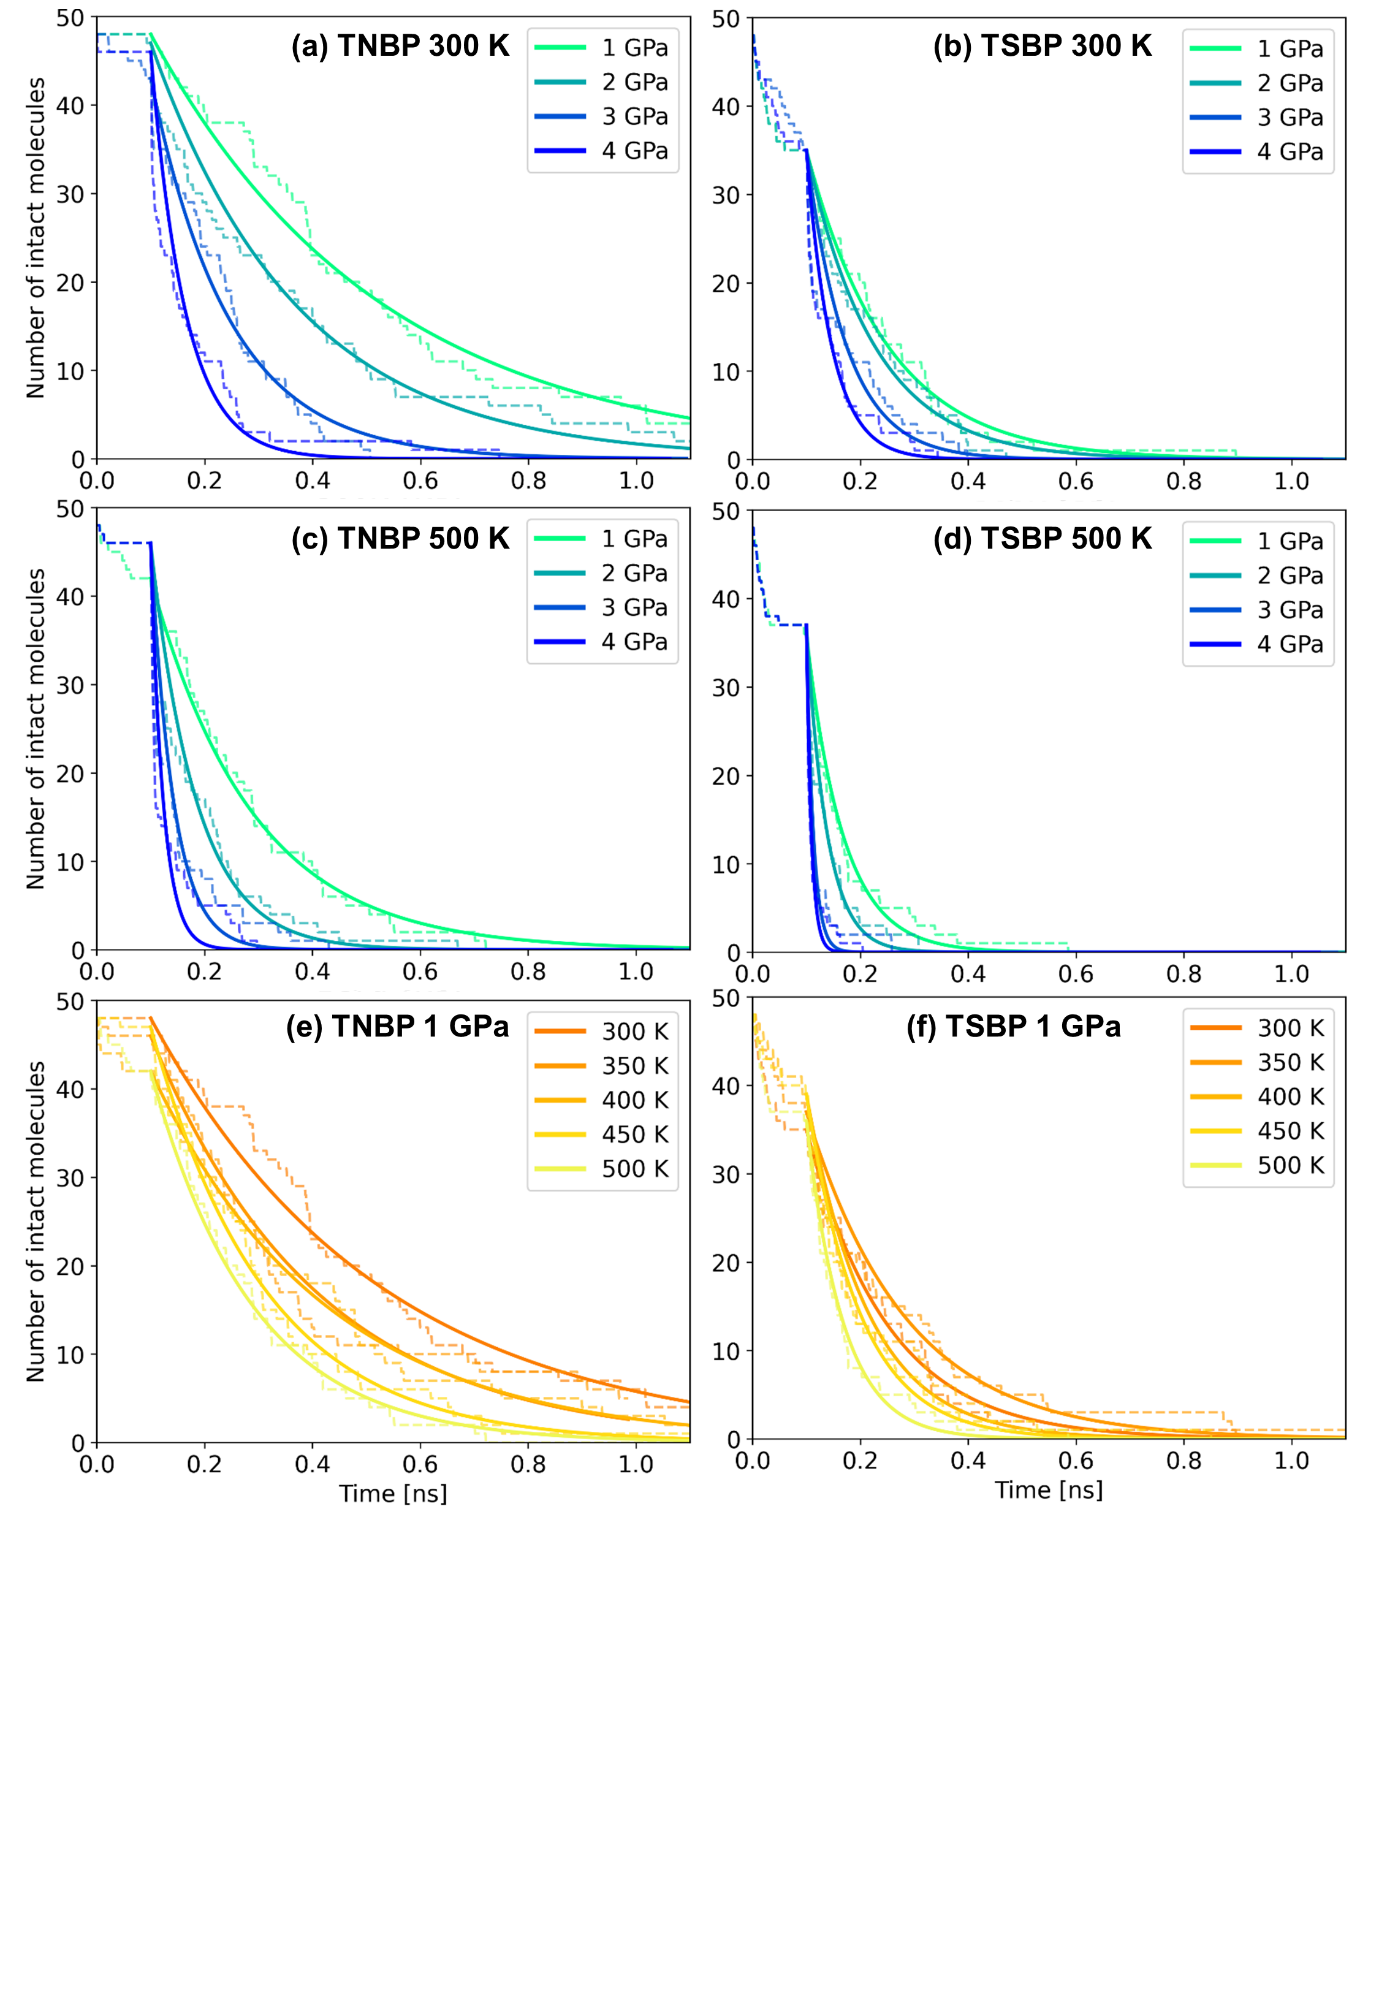
**

**Supplementary Figure 1.** Variation in the number of intact phosphate ester molecules with sliding time. Dashed lines are results from the NEMD simulations, solid lines are exponential decay fits to the data. The effect of pressure on the dissociation of TNBP (a) and TBSP (b) at low temperature (300 K). The influence of pressure on the dissociation of TNBP (c) and TBSP (d) at high temperature (300 K). The effect of temperature on the dissociation of TNBP (d) and TBSP (e) at low pressure (1 GPa).

**
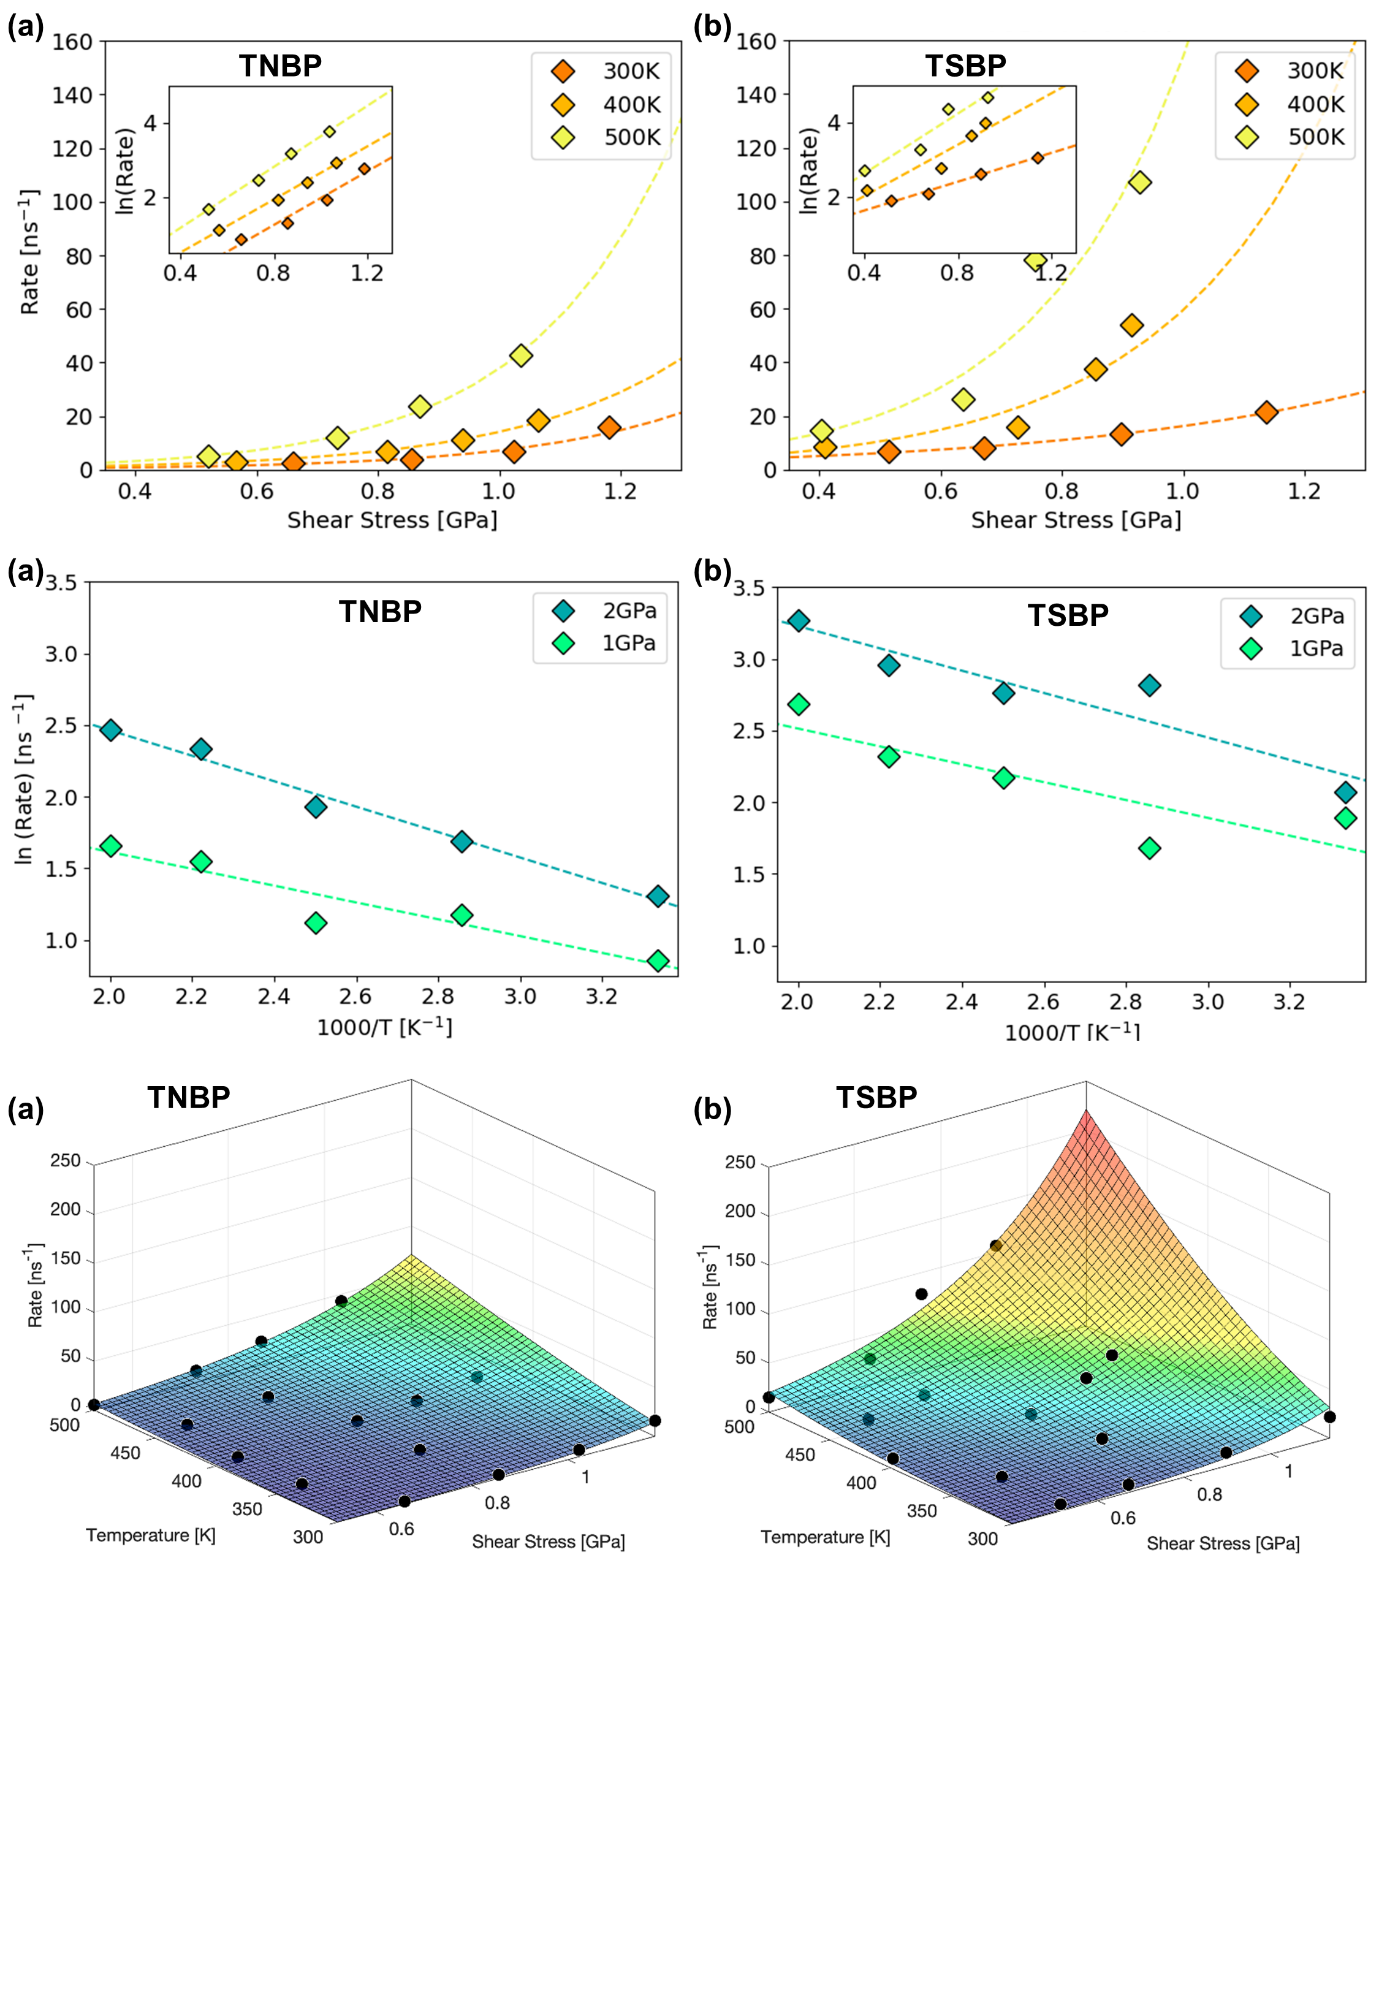
**

**Supplementary Figure 2.** Arrhenius plots of ln(rate) versus 1000/T for TNBP (a) and TSBP (b) obtained at different pressures. From Equation (1), the intercept of the dashed lines gives *A* and gradient gives *Ea*.
